# Supplementary material for: Prevalence of Congenital Anomalies in the Japan Environment and Children’s Study
Source: PubMed Central journal article supplement (PMC6556438; doi:10.2188/jea.je20180014), 2019-07-05
Supplement: je-29-247-s001.pdf [file je-29-247-s001.pdf]

**eTable 1. Number of infants at each regional center according to maternal age at delivery**

|                                 | Total   | Hokkaido | Miyagi | Fukushima | Chiba | Kanagawa | Koshin | Toyama | Aichi | Kyoto | Osaka | Hyogo | Tottori | Kochi | Fukuoka | South<br>kyushyu |
|---------------------------------|---------|----------|--------|-----------|-------|----------|--------|--------|-------|-------|-------|-------|---------|-------|---------|------------------|
| Number                          | 101,825 | 8,051    | 9,210  | 13,013    | 6,047 | 6,523    | 7,242  | 5,496  | 5,622 | 3,966 | 7,966 | 5,134 | 3,066   | 7,040 | 7,649   | 5,800            |
| maternal age at delivery, years |         |          |        |           |       |          |        |        |       |       |       |       |         |       |         |                  |
| <20                             | 895     | 38       | 84     | 127       | 60    | 68       | 76     | 19     | 40    | 30    | 120   | 38    | 19      | 59    | 62      | 55               |
| 20-24                           | 9,304   | 653      | 1,268  | 1,467     | 527   | 449      | 566    | 334    | 381   | 193   | 942   | 424   | 250     | 549   | 616     | 685              |
| 25-29                           | 27,964  | 2,145    | 2,859  | 3,924     | 1,706 | 1,574    | 1,902  | 1,458  | 1,454 | 924   | 2,155 | 1,327 | 824     | 1,981 | 1,969   | 1,762            |
| 30-34                           | 35,936  | 2,984    | 3,055  | 4,460     | 2,105 | 2,344    | 2,590  | 1,986  | 2,110 | 1,504 | 2,586 | 1,845 | 1,118   | 2,531 | 2,804   | 1,914            |
| 35-39                           | 22,978  | 1,848    | 1,619  | 2,565     | 1,406 | 1,669    | 1,719  | 1,421  | 1,350 | 1,070 | 1,794 | 1,237 | 714     | 1,600 | 1,818   | 1,148            |
| ≥40                             | 4,736   | 381      | 322    | 468       | 243   | 417      | 389    | 277    | 287   | 245   | 369   | 262   | 141     | 320   | 379     | 236              |
| unknown                         | 12      | 2        | 3      | 2         | 0     | 2        | 0      | 1      | 0     | 0     | 0     | 1     | 0       | 0     | 1       | 0                |

**eTable 2.** Number and proportion of congenital anomaly cases confirmed with ICD-10 code in the reporting pattern in the Kochi regional center

|                 |               | D-DELIVERY <sup>a</sup> |       | D-1M <sup>b</sup> |       | D-OR <sup>c</sup> |       | D-AND <sup>d</sup> |       |
|-----------------|---------------|-------------------------|-------|-------------------|-------|-------------------|-------|--------------------|-------|
| Medical records | Confirmed     | 102                     | 82.3% | 113               | 83.7% | 132               | 78.6% | 83                 | 91.2% |
|                 | Not confirmed | 22                      | 17.7% | 22                | 16.3% | 36                | 21.4% | 8                  | 8.8%  |
| Total           |               | 124                     | 100%  | 135               | 100%  | 168               | 100%  | 91                 | 100%  |

ICD-10, International Statistical Classification of Diseases and Related Health Problems, 10th revision.

Confirmed and non-confirmed status expressed in terms of total number and percentage by categories.

<sup>a</sup> D-DELIVERY includes congenital anomalies reported only at delivery data collection.

<sup>b</sup> D-1M includes congenital anomalies reported only at 1 month data collection.

<sup>c</sup> D-OR includes congenital anomalies reported either at delivery or at 1 month data collection.

<sup>d</sup> D-AND includes congenital anomalies reported at both delivery and at 1 month data collection, only at delivery, and only at 1 month data collection.
